# Supplementary material for: Mass Spectrometric Analysis of Purine Intermediary Metabolism Indicates Cyanide Induces Purine Catabolism in Rabbits
Source: MDPI journal article supplement (doi:10.3390/metabo14050279), 2024-05-10
Supplement: s1 [file s1]

## SUPPORTING INFORMATION

Article

# Mass Spectrometric Analysis of Purine Intermediary Metabolism Indicates Cyanide Induces Purine Catabolism in Rabbits

Running title: In vivo effects of cyanide on purine metabolism

Jordan Morningstar <sup>1</sup>, Jangwoen Lee <sup>2</sup>, Sari Mahon <sup>2</sup>, Matthew Brenner <sup>2,3</sup> and Anjali K. Nath <sup>1,4,\*</sup>

<sup>1</sup> Division of Cardiovascular Medicine, Beth Israel Deaconess Medical Center, Boston, MA 02215, USA; morningj@msc.edu

<sup>2</sup> Beckman Laser Institute, University of California, Irvine, CA 92697, USA; jangwl@hs.uci.edu (J.L.); mahonsb@hs.uci.edu (S.M.); mbrenner@uci.edu (M.B.)

<sup>3</sup> Division of Pulmonary and Critical Care Medicine, Department of Medicine, University of California, Irvine, CA 92697, USA; mbrenner@uci.edu (M.B.)

<sup>4</sup> Harvard Medical School, Boston, MA 02215, USA

\* Correspondence: anath1@bidmc.harvard.edu

**Keywords:** mass spectrometry (MS); purine; nucleoside/nucleotide metabolism; metabolic regulation; cytochrome c oxidase (Complex IV); animal model; allopurinol

---

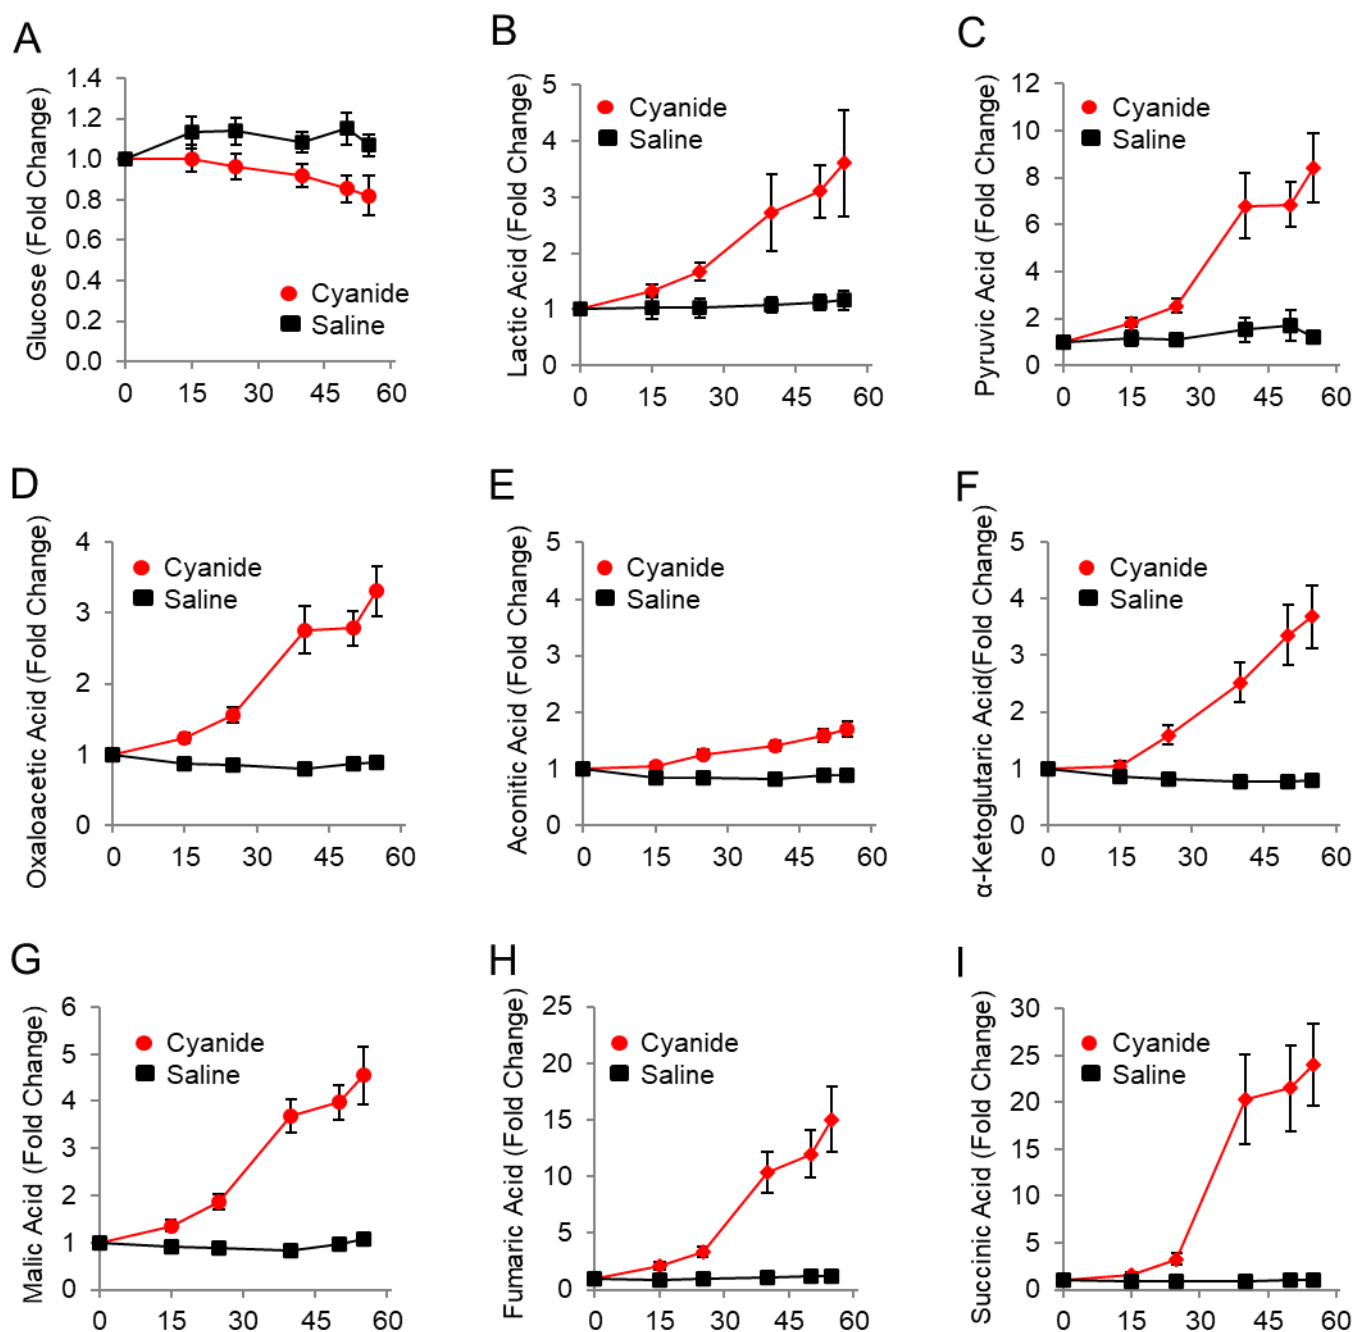

**Figure S1.** Plasma levels of glycolytic and TCA cycle metabolites increase in rabbits exposed to a lethal dose of cyanide. Metabolites were measured in the plasma of cyanide-treated animals ( $n = 15$ ) and sham control animals ( $n = 5$ ): (A) glucose, (B) lactic acid, (C) pyruvic acid, (D) oxaloacetic acid, (E) aconitic acid, (F)  $\alpha$ -ketoglutaric acid, (G) malic acid, (H) fumaric acid, and (I) succinic acid. See Table 1 in the manuscript for P values and q values.

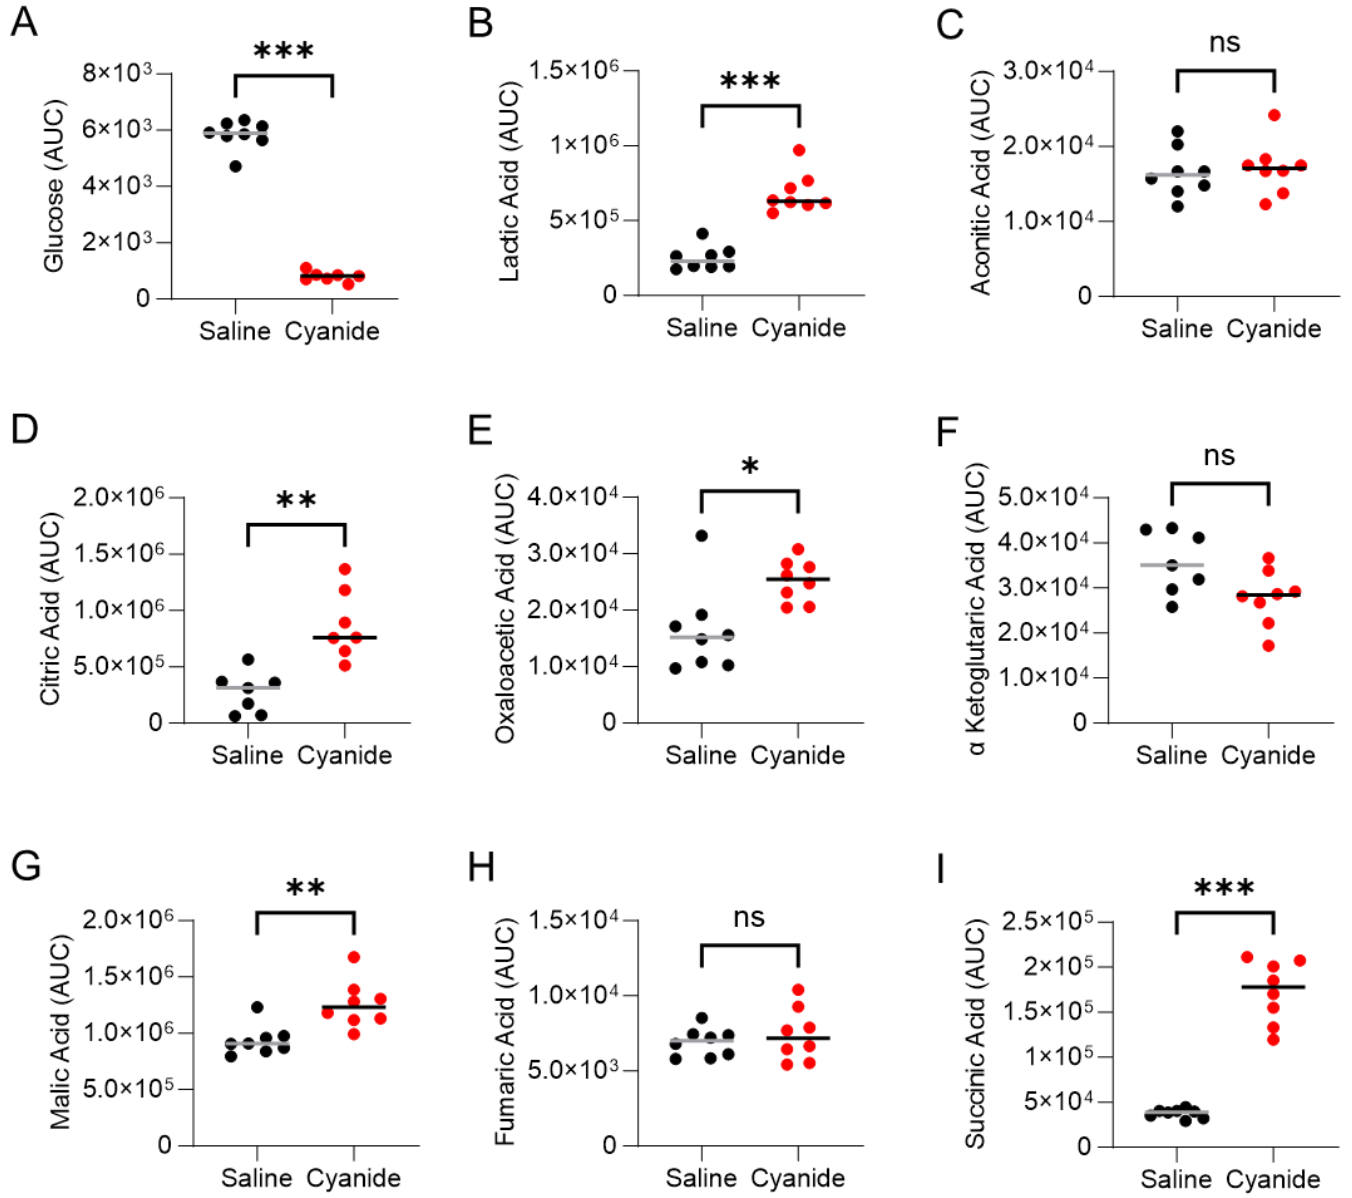

**Figure S2.** Glycolytic and TCA cycle metabolites increase in zebrafish larvae exposed to a lethal dose of cyanide. Metabolites were measured in lysates ( $n = 8$ ) from whole zebrafish larvae (6 d.p.f.) exposed to saline or 25  $\mu$ M potassium cyanide for 2 hours. Each data point represents a group of 10 larvae. (A) Glucose ( $P = 0.00031$ ;  $q = 0.00032$ ), (B) lactic acid ( $P = 0.00015$ ;  $q = 0.00024$ ), (C) aconitic acid (n.s.), (D) citric acid ( $P = 0.00116$ ;  $q = 0.00091$ ), (E) oxaloacetic acid ( $P = 0.01041$ ;  $q = 0.00546$ ), (F)  $\alpha$ -ketoglutaric acid (n.s.), (G) malic acid ( $P = 0.00186$ ;  $q = 0.00117$ ), (H) fumaric acid (n.s.), and (I) succinic acid ( $P = 0.00015$ ;  $q = 0.00024$ ). ns =  $P > 0.05$ ; \* =  $P \leq 0.05$ ; \*\* =  $P \leq 0.01$ , \*\*\* =  $P \leq 0.001$ .

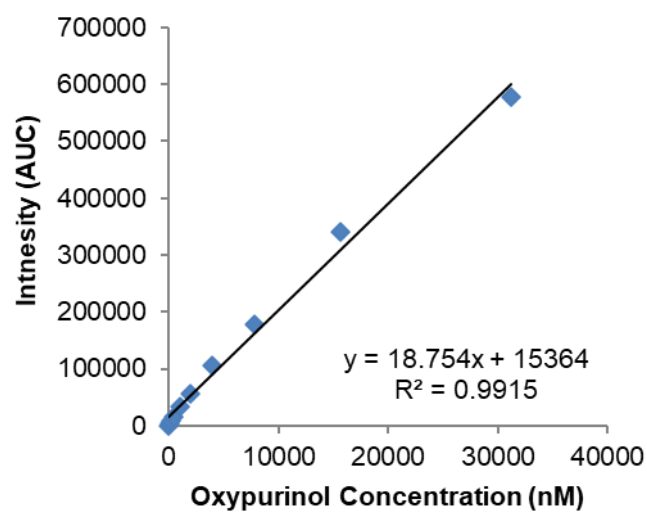

**Figure S3.** Oxypurinol quantification by mass spectrometry. To generate the oxypurinol standard curve, oxypurinol was spiked into pooled reference plasma, serially diluted, and analyzed by LC-MS/MS. The standard curve was linear from 122 nM to 31.25  $\mu$ M. The absolute concentration of oxypurinol in treated animals was calculated using this standard curve. See **Table S1** for multiple reaction monitoring (MRM) transitions.

**Table S1.** Multiple reaction monitoring transitions of compounds and their coefficient of variation in pooled plasma.

| Ionization Mode | Q1 Precursor (m/z) | Q3 Product (m/z) | Collision Energy (eV) | Metabolite Name                       | Coefficient of Variation* |
|-----------------|--------------------|------------------|-----------------------|---------------------------------------|---------------------------|
| Negative        | 181.22             | 138.2            | -6                    | Citrulline-d <sub>7</sub>             | 7.7                       |
| Negative        | 271.2              | 138.9            | -22                   | Inosine- <sup>15</sup> N <sub>4</sub> | 8.5                       |
| Negative        | 129.11             | 42.1             | -14                   | Thymine-d <sub>4</sub>                | 7.2                       |
| Negative        | 172.19             | 154.1            | -6                    | Phenylalanine-d <sub>8</sub>          | 6.5                       |
| Negative        | 161.1              | 113.1            | -2                    | Glucose                               | 11.6                      |
| Negative        | 87.05              | 43               | -14                   | Pyruvic acid                          | 8.1                       |
| Negative        | 89.1               | 43.1             | -16                   | Lactic acid                           | 5.9                       |
| Negative        | 131.1              | 87.1             | -14                   | Oxaloacetate                          | 11.3                      |
| Negative        | 191.1              | 111.1            | -15                   | Citric acid-Isocitric acid            | 15.0                      |
| Negative        | 173.05             | 85               | -17                   | Aconitic acid                         | 19.6                      |
| Negative        | 145.1              | 101.1            | -13                   | α-Ketoglutaric acid                   | 9.1                       |
| Negative        | 117.1              | 73               | -12                   | Succinic acid                         | 9.1                       |
| Negative        | 115.06             | 71.01            | -13                   | Fumaric acid                          | 36.8                      |
| Negative        | 133.08             | 115              | -14                   | Malic acid                            | 18.5                      |
| Negative        | 151.02             | 42.1             | -16                   | Oxypurinol                            | 7.9                       |
| Negative        | 267.2              | 135              | -27                   | Inosine                               | 9.9                       |
| Negative        | 346.2              | 78.8             | -50                   | AMP                                   | 23.8                      |
| Negative        | 135.1              | 92.1             | -18                   | Hypoxanthine                          | 7.6                       |
| Negative        | 157.05             | 114              | -17                   | Allantoin                             | 16.5                      |
| Negative        | 167.001            | 124              | -17                   | Uric acid                             | 6.9                       |
| Negative        | 151.1              | 108              | -23                   | Xanthine                              | 6.4                       |
| Negative        | 283.2              | 150.9            | -24                   | Xanthosine                            | 21.9                      |

m/z: mass/charge; eV: electron volt. \*Calculated from measurements in pooled plasma samples, except for oxypurinol which was calculated from oxypurinol spiked plasma samples.
